# Supplementary material for: Perinatal Depression and Its Impact on Infant Outcomes and Maternal-Nurse SMS Communication in a Cohort of Kenyan Women
Source: Research Square preprint supplement (doi:10.21203/rs.3.rs-1034878/v1), 2021-11-24
Supplement: Supplementary file 1 [file 1556649fe50bea4e9199940e.pdf]

## APPENDIX:

**Supplementary Table A. Baseline Characteristics for Total and Retained Cohorts**

| Variables                                                           | Total Cohort (n = 798)<br>n (%) or median (IQR) | Retained Cohort (n = 572)<br>n (%) or median (IQR) |
|---------------------------------------------------------------------|-------------------------------------------------|----------------------------------------------------|
| <b>Age in years</b>                                                 | 24 (21- 29)                                     | 25 (22-29)                                         |
| <b>Adolescents</b>                                                  | 97 (12.3%)                                      | 58 (10.2%)                                         |
| <b>Marital Status</b><br>Not Married/Cohabiting                     | 101 (12.9%)                                     | 64 (11.3%)                                         |
| <b>Education level</b><br>Less than primary education               | 81 (10.2%)                                      | 47 (8.2%)                                          |
| <b>Employment Status</b><br>Unemployed                              | 563 (70.6%)                                     | 394 (68.9%)                                        |
| <b>Primigravida</b>                                                 | 294 (36.8%)                                     | 194 (33.9%)                                        |
| <b>Number of Living Children</b>                                    | 1 (0-2)                                         | 1 (0-2)                                            |
| <b>History of Miscarriage</b>                                       | 83 (10.4%)                                      | 65 (11.4%)                                         |
| <b>Undesired Pregnancy</b>                                          | 281 (35.3%)                                     | 195 (34.2%)                                        |
| <b>Never Used Family Planning</b>                                   | 263 (33.0%)                                     | 160 (28.0%)                                        |
| <b>Median monthly household income in KSh</b>                       | 10,000 (4625-14,000)                            | 10,000 (6000-14,000)                               |
| <b>Experiencing abuse during pregnancy</b>                          | 30 (3.8%)                                       | 19 (3.3%)                                          |
| <b>Living with HIV</b>                                              | 52 (6.6%)                                       | 36 (6.3%)                                          |
| <b>Distance from home to clinic <math>\geq 30</math> min</b>        | 541 (67.9%)                                     | 358 (62.7%)                                        |
| <b>Share the phone with someone</b>                                 | 141 (17.7%)                                     | 81 (14.2%)                                         |
| <b>Antenatal depression (EPDS <math>\geq 10</math> at baseline)</b> | 256 (32.1%)                                     | 163 (28.5%)                                        |

**Supplementary Table B. Baseline Characteristics of Excluded vs. Retained Cohorts**

| Variables                                                    | Excluded Cohort (n = 226)<br>n (%) or median (IQR) | Retained Cohort (n = 572)<br>n (%) or median (IQR) | p-value  |
|--------------------------------------------------------------|----------------------------------------------------|----------------------------------------------------|----------|
| <b>Age in years</b>                                          | 23 (20-27)                                         | 25 (22-29)                                         | <0.0001* |
| <b>Adolescents</b>                                           | 39 (17.5%)                                         | 58 (10.2%)                                         | 0.0074*  |
| <b>Marital Status</b><br>Not Married/Cohabiting              | 37 (16.9%)                                         | 64 (11.3%)                                         | 0.048*   |
| <b>Education level</b><br>Less than primary education        | 34 (15.0%)                                         | 47 (8.2%)                                          | 0.0060*  |
| <b>Employment Status</b><br>Unemployed                       | 169 (75.1%)                                        | 394 (68.9%)                                        | 0.10     |
| <b>Primigravida</b>                                          | 100 (44.2%)                                        | 194 (33.9%)                                        | 0.0082*  |
| <b>Number of Living Children</b>                             | 0 (0-1)                                            | 1 (0-2)                                            | 0.0055*  |
| <b>History of Miscarriage</b>                                | 18 (8.0%)                                          | 65 (11.4%)                                         | 0.20     |
| <b>Unwanted Pregnancy</b>                                    | 86 (38.2%)                                         | 195 (34.2%)                                        | 0.33     |
| <b>Never Used Family Planning</b>                            | 103 (45.6%)                                        | 160 (28.0%)                                        | <0.0001* |
| <b>Median monthly household income in KSh</b>                | 9000 (1500-14,000)                                 | 10,000 (6000-14,000)                               | 0.13     |
| <b>Experiencing abuse during pregnancy</b>                   | 11 (4.9%)                                          | 19 (3.3%)                                          | 0.41     |
| <b>Living with HIV</b>                                       | 16 (7.1%)                                          | 36 (6.3%)                                          | 0.82     |
| <b>Distance from home to clinic <math>\geq 30</math> min</b> | 183 (81.0%)                                        | 358 (62.7%)                                        | <0.0001* |
| <b>Share the phone with someone</b>                          | 60 (26.6%)                                         | 81 (14.2%)                                         | <0.0001* |
